# Supplementary material for: Polyarginine Cell-Penetrating Peptides Bind and Inhibit SERCA2
Source: MDPI journal article supplement (doi:10.3390/cells12192358), 2023-09-26
Supplement: s1 [file s1]

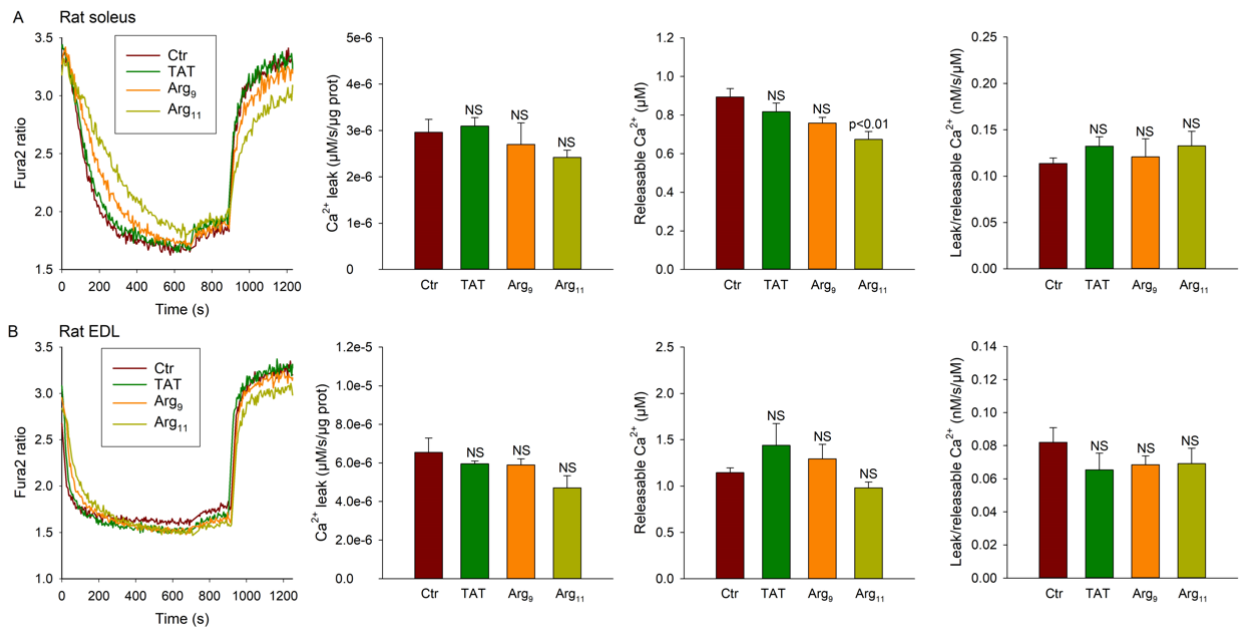

**Supplementary Figure S1:** Effects of CPPs on SR Ca<sup>2+</sup> leak and releasable Ca<sup>2+</sup> in soleus and EDL. Soleus (**A**) and EDL (**B**) homogenates were incubated with TAT, Arg<sub>9</sub>, or Arg<sub>11</sub>, and compared with untreated control preparations (Ctr). Representative recordings (left panels) and mean measurements (remaining panels) illustrate effects on raw SR Ca<sup>2+</sup> leak, releasable SR [Ca<sup>2+</sup>], and leak normalized to releasable [Ca<sup>2+</sup>]. Paired measurements of SR Ca<sup>2+</sup> uptake are presented in Fig. 4. Data are presented as mean ± SEM. Statistical analyses were performed by one-way ANOVA with Tukey's post-hoc correction. P values are indicated versus Ctr. NS = not statistically significant. n<sub>runs</sub> in Ctr, TAT, Arg<sub>9</sub>, Arg<sub>11</sub> = 6, 5, 6, 6 in homogenates from 4 soleus muscles; 7, 5, 6, 5 in homogenates from 4 EDL muscles.
