# Supplementary material for: Polyarginine Cell-Penetrating Peptides Bind and Inhibit SERCA2
Source: MDPI journal article supplement (doi:10.3390/cells12192358), 2023-09-26
Supplement: s1 [file s1]

Archive with 1 entries (1 files):
- cells-12-02358-s001.pdf
